# Supplementary material for: Evolutionary Origin of the P2X7 C-ter Region: Capture of an Ancient Ballast Domain by a P2X4-Like Gene in Ancient Jawed Vertebrates
Source: PubMed Central journal article supplement (PMC7016195; doi:10.3389/fimmu.2020.00113), 2020-02-06
Supplement: Image_2.pdf [file Image_2.pdf]

**Figure S2. Multiple alignment of P2X7 C Cys anchor (Exon 11) from representative species of mammals and reptiles.**

Key residues of the C Cyst anchor are highlighted in yellow, an additional cystein is highlighted in grey.

Species : **Mammals:** Human, *Homo sapiens* (hosa) ; Mouse, *Mus musculus* (mumu) ; Rat, *Rattus norvegicus* (rano) ; Rabbit, *Oryctolagus cuniculus* (Orcu) ; Bison, *Bison bison* (Bibi) ; Cow, *Bos taurus* (Bota) ; Dolphin, *Tursiops truncatus*, (Tutr) ; Sperm whale, *Physeter macrocephalus* (Phma) ; Microbat, *Myotis lucifugus* (Mylu) ; Megabat, *Pteropus vampyrus* (Ptva) ; American mink, *Neovison vison* (Nevi) ; Cat, *Felix catus*, (Feca); Panda, *Ailuropoda melanoleuca* (Aime) ; Elephant *Loxodonta africana* (Loaf) ; Armadillo *Dasypus novemcinctus* (Dano) ; Common wombat, *Vombatus ursinus* (Vour) ; Wallaby *Notamacropus eugenii* (Noeu) ; Opossum, *Monodelphis domestica* (Modo)

**Reptiles and birds :** Carolina anole, *Anolis carolinensis* (Anca) ; Chicken, *Gallus gallus* (Gaga); Chinese softshell turtle, *Pelodiscus sinensis*, (Pesi) ; Abingdon island giant tortoise, *Chelonoidis abingdonii* (chab).

|                           |                                                   |                                                     |
|---------------------------|---------------------------------------------------|-----------------------------------------------------|
| <b>Eutherians</b>         | Hosa                                              | AAVFIDFLIDTYSSNCCRSHIYPWCKCCQPCVVNEYYYRKKCESIVEPK   |
|                           | Mumu                                              | ATVCIDLLINTYSSAFCRSGVYPYCKCCEPCTVNEYYYRKKCESIMEPKP  |
|                           | Rano                                              | ATVCIDLIINTYASTCCRSRVYPSCCKCEPCAVNEYYYRKKCEPIVEPKP  |
|                           | Orcu                                              | ATVCIDFLINTYSSNCCRSHIYPRCTCCEPCAANEYYHRKKYESLVEPRR  |
|                           | Bibi                                              | ATVFIDMLINTYSSKYCRSHVYPWCKCCQPCAVNEYYYKKYESIVEPTR   |
|                           | Bota                                              | ATVFIDMLINTYSSKYCRSHVYPWCKCCQPCAVNEYYYKKYESIVEPTR   |
|                           | Tutr                                              | ATVFIDFLINTYSNKCCRSHIYPCCKCCEPCKVNEYYYRKKCESIVEPKQ  |
|                           | Phma                                              | ATVFIDFLINTYSYKCCRSRIYPCCKCCEPCAVNEYYYRKKCESIAEPKQ  |
|                           | Mylu                                              | ATVFIDFLINTCNTSCQSYCKCCECCAVNEYYYKKCESIVEPKS        |
|                           | Ptva                                              | ATMFIDSLIDTYSKCCRSRIYPYCKCCECCAVNEYYYRKKCESIVEPKP   |
|                           | Nevi                                              | VTVIIDLLICTYSSTCCRSHIYPSFKCCKYCAVNEYYYRKKGEPIVEPKR  |
|                           | Feca                                              | ATLFIDFLINTYSSKCCRSHIYPCFKCCECCAVNEYYYRKKCETIVEPKAT |
|                           | Aime                                              | ATVFIDILINTYSSKCCRSRIYPCFKCCEYCAVNEYYYRKKQSEPIAEPKP |
|                           | Loaf                                              | ATVFIDFLINTYSTECCGK---CVHPYCKRCRVNEYYYKKCETIVEPKA   |
| Dano                      | ATVFIDFLINTYSSGWCQSYVYPCKCCQPCAVNEYYYRKKCESIVEPKP |                                                     |
| <b>Marsupials</b>         | Vour                                              | ATVFIDFLIDTYSSTCCRSRVYRCCPVCEPCGVNEYYYRKKCETIEEPKP  |
|                           | Noeu                                              | ATVFIDFLIDTYSSTCCRSSVYHCCPVCEPCGVNEYYYRKKCETIEEPKR  |
|                           | Modo                                              | ATVFIDFLIDTYSSTCCRTHVYPCCKACEPCGVNEYYYRKKCETIEEPKP  |
| <b>Reptiles and birds</b> | Gaga                                              | AVTIIEMCFHLYNCSSCC-----KIQVCENVIRKKYETVLMPEQ-       |
|                           | Anca                                              | AQLTVDFLITSYSYSCC-----KYDPVKEYYYKKCESVPGPRW         |
|                           | Pesi                                              | AQFLIDFLITSYTFPCC-----KASIKKYYFRKKCESAPGPKWT        |
|                           | Chab                                              | AQFVIDFLITSYTYPCC-----KASIKEYYFRKKCESALGPKWV        |
