# Supplementary material for: Evolutionary Origin of the P2X7 C-ter Region: Capture of an Ancient Ballast Domain by a P2X4-Like Gene in Ancient Jawed Vertebrates
Source: PubMed Central journal article supplement (PMC7016195; doi:10.3389/fimmu.2020.00113), 2020-02-06
Supplement: Image_4.pdf [file Image_4.pdf]

**Figure S4. Variable degree of conservation of P2X7 putative LPS and GDP binding motifs in other ZCD containing proteins.**

Residues consistent with consensus LBP/BPI from ref Denlinger et al J Immunol 2001; 167:1871-1876 are in bold and blue. Residues not consistent with the consensus are highlighted in grey. Sequences of ZCD containing proteins are as in Figure 5.

|                     |                                                                                                                                                                                                            |                             |
|---------------------|------------------------------------------------------------------------------------------------------------------------------------------------------------------------------------------------------------|-----------------------------|
| Hosa_LPBmotif       | <b>GRWKVRK</b> SFFKL <b>QGSFDV</b>                                                                                                                                                                         | <b>LPS binding motif</b>    |
| Hosa_BPImotif       | G <b>KWKAQ</b> K <b>RFLK</b> M <b>SGNKDL</b>                                                                                                                                                               | a:aromatic, h:hydrophobic   |
| Consensus Denlinger | x+W+h <b>RK</b> x <b>Fh</b> Kxp <b>G</b> paph                                                                                                                                                              | p:polar, x:random, -:acidic |
| Dare_LBP            | <b>GRWRTK</b> F <b>GII</b> T <b>D</b> SGSFDV-                                                                                                                                                              | and + :basic                |
| Tetraodon BPI-like  | <b>GNWRVKYR</b> W <b>VKN</b> SGSFD                                                                                                                                                                         |                             |
| Hosa_P2RX7          | NSRLRH <b>CAYRC</b> YATWRFG--SQDMADFAILPSCC <b>RWRIRKE</b> F <b>PKSE</b> Q <b>YSG</b> FKSPY----                                                                                                            |                             |
| Aime_P2RX7          | -SRLRH <b>CAYRC</b> YTTWRFG--SPDLADFAILPSCC <b>RWRIRRE</b> F <b>PKSE</b> Q <b>YTG</b> FQSPY                                                                                                                |                             |
| Dare_P2X7           | -SQLRHGAYA <b>QFIR</b> WRFGD-STPRDALPVI <b>PSCCI</b> WRIRAEY <b>PS</b> PD <b>GYRGL</b> RSFQVITSQTEVNR                                                                                                      |                             |
| Dare_nanor          | NFIFLCWS--DVGQQTRAVIPSCVAG <b>RM</b> RQKLPE <b>GN</b> NYNGLFPRPL-----                                                                                                                                      |                             |
| Dare_nanorb         | NIVWVCWG-YLGREIRVVI <b>PSCAVT</b> IRIQ <b>EF</b> PDENE <b>NYT</b> GYLPRM-----                                                                                                                              |                             |
| Elel_nanor          | KCIICWNREFLGRLSRIPIPSFVV <b>NI</b> GQ <b>TF</b> PNEH <b>GLP</b> -----                                                                                                                                      |                             |
| Krma_nanor          | QFVSWCWS-FLGEHIRVVL <b>PSCVVS</b> KIRAF <b>F</b> PPP <b>GLE</b> NFVFTGFLD-----                                                                                                                             |                             |
| Stpu_ZCD            | NRAMRHAAYRCFVFWQH <b>G</b> --RLGQGNRRV <b>PSCVSE</b> IRGMYP <b>SATV</b> V <b>VRK</b> -----                                                                                                                 |                             |
| Sako_ZCD            | NACFRHYAYRQFIYWQY <b>G</b> --RLGKGNRRV <b>PSCCV</b> WAVRR <b>F</b> PSPNNV <b>YV</b> GFKEGAIQD-                                                                                                             |                             |
| Amqu_ZCD            | PESFRKAAYRQYILWKYK--KL <b>GKGNRRV</b> CPSCV <b>VNC</b> IREWY <b>PSS</b> TGR <b>YMG</b> FRSE-----                                                                                                           |                             |
| Polu_ZCD            | TQSYRKAAYRQYTLWKFG--KL <b>GKGNRK</b> ILPSCV <b>IV</b> IRRAY <b>PAP</b> D <b>GNYM</b> GFRRS-----                                                                                                            |                             |
| Aipt_ZCD1           | TSSFRKAAYRQFILWEHG--YL <b>GKGNRRI</b> IPSCD <b>VK</b> KVRAKY <b>PAP</b> D <b>NVYM</b> GFMAE-----                                                                                                           |                             |
| Aipt_ZCD2           | MEGFRKAGYRQFALWRY <b>G</b> --KL <b>GKGNRRIL</b> PACV <b>VK</b> IRIQY <b>PAP</b> D <b>GRYM</b> GYRAN-----                                                                                                   |                             |
| Aipt_ZCD3           | MNGYRKTAYRTYILWKY <b>G</b> --KL <b>GKGNRK</b> VVPACV <b>VRA</b> IRRAY <b>PSE</b> D <b>NVYM</b> GFRRS-----                                                                                                  |                             |
| Amfe_ZCD            | VNSYRKAAYRQYILWKY <b>G</b> --KL <b>GKGNRRV</b> CPSCV <b>VRL</b> VRQTY <b>PS</b> PD <b>GEYM</b> GFRRH-----                                                                                                  |                             |
| Crgi_ZCD            | QSTFRNQAYRN <b>FV</b> LWQH <b>S</b> --TLGAGRRV <b>PV</b> PSCV <b>CVA</b> IRRR <b>F</b> PQ <b>ANGQY</b> MGYHSANS <b>DSE</b>                                                                                 |                             |
| Logi_ZCD            | NKTFRNQAYRN <b>FIL</b> WQH <b>G</b> --KM <b>SGKR</b> KPLPACTY <b>V</b> IRAT <b>F</b> PSN-- <b>EYSGY</b> HSA <b>FS</b> DSE                                                                                  |                             |
| Ixsc_ZCD            | HERHRYTAYQQFTW <b>VDH</b> --KPRHG <b>NR</b> VPLPSCA <b>VE</b> IRIR <b>EF</b> PST <b>NGSY</b> VDQ <b>KK</b> -----                                                                                           |                             |
| Mype_ZCD            | NSSWR <b>FIC</b> Y <b>TQ</b> Y <b>TH</b> W <b>INS</b> W <b>S</b> S <b>F</b> G <b>K</b> G <b>V</b> R <b>V</b> IPACV <b>VKT</b> IR <b>E</b> KY <b>PE</b> V <b>NGVYV</b> GF <b>K</b> NG <b>S</b> KL <b>PN</b> |                             |
| Haco_ZCD            | NRCFRY <b>CAY</b> RS <b>FVI</b> W <b>CY</b> G--RLGILRG <b>FEL</b> PACV <b>RGA</b> IM <b>KE</b> F <b>PS</b> D <b>SGSY</b>                                                                                   |                             |
